# Supplementary material
Source: MDPI journal article supplement (https://www.mdpi.com/2073-4441/13/2/179)
Supplement: s1 [file s1]

# Effects of Climatic Drivers and Teleconnections on Late 20<sup>th</sup> Century Trends in Spring Freshet of Four Major Arctic-Draining Rivers

Roxanne Ahmed <sup>1</sup>, Terry Prowse <sup>1,2</sup>, Yonas Dibike <sup>1,2,\*</sup> and Barrie Bonsal <sup>1,3</sup>

**Table S1.** Characteristics of drainage sub-basins identified in Figure 2. Note: M = Mackenzie, O = Ob, L = Lena, Y = Yenisei, H<sub>U</sub> = unregulated, H<sub>R</sub> = Regulated and H<sub>M</sub> = minimally regulated. Stations IDs in *italic* have data during *t*<sub>2</sub> (1980–2000) only.

| Label | Basin | ID      | Lat. (°N) | Long. (°E) | D.A. (km <sup>2</sup> ) | % Infilled | Classification | Region |
|-------|-------|---------|-----------|------------|-------------------------|------------|----------------|--------|
| 1     | M     | 07AD002 | 53.42     | -117.57    | 9765                    | 0.0%       | H <sub>U</sub> | South  |
| 2     | M     | 07DA001 | 56.78     | -111.4     | 132585                  | 0.0%       | H <sub>U</sub> | East   |
| 3     | M     | 07GJ001 | 55.71     | -117.62    | 50300                   | 0.0%       | H <sub>U</sub> | South  |
| 4     | M     | 07KC001 | 59.11     | -112.43    | 293000                  | 0.0%       | H <sub>R</sub> | East   |
| 5     | M     | 07NB001 | 59.87     | -111.58    | 606000                  | 0.0%       | H <sub>M</sub> | East   |
| 6     | M     | 10BE001 | 59.41     | -126.1     | 104000                  | 0.0%       | H <sub>U</sub> | West   |
| 7     | M     | 10CD001 | 58.79     | -122.66    | 20300                   | 0.0%       | H <sub>U</sub> | West   |
| 8     | M     | 10ED002 | 61.75     | -121.22    | 275000                  | 0.0%       | H <sub>U</sub> | West   |
| 9     | M     | 10JC003 | 65.13     | -123.55    | 146400                  | 15.60%     | H <sub>U</sub> | North  |
| 10    | M     | 10FA002 | 61.14     | -119.84    | 9270                    | 0.0%       | H <sub>U</sub> | East   |
| 11    | M     | 10FB005 | 61.45     | -121.24    | 1310                    | 0.0%       | H <sub>U</sub> | West   |
| 12    | M     | 10GC003 | 61.9      | -121.61    | 2050                    | 0.0%       | H <sub>U</sub> | North  |
| 13    | M     | 10KA001 | 65.27     | -126.84    | 1594500                 | 11.80%     | H <sub>M</sub> | North  |
| 14    | M     | 07OB001 | 60.74     | -115.86    | 51700                   | 0.0%       | H <sub>U</sub> | East   |
| 15    | M     | 07TA001 | 63.11     | -116.97    | 13900                   | 0.0%       | H <sub>U</sub> | East   |
| 16    | M     | 07AA001 | 52.86     | -118.11    | 629                     | 0.0%       | H <sub>U</sub> | South  |
| 17    | M     | 07AA002 | 52.91     | -118.06    | 3872                    | 0.0%       | H <sub>U</sub> | South  |
| 18    | M     | 07AF002 | 53.47     | -116.63    | 2562                    | 0.0%       | H <sub>U</sub> | South  |
| 19    | M     | 07AG003 | 53.6      | -116.27    | 826                     | 0.0%       | H <sub>U</sub> | South  |
| 20    | M     | 07BB002 | 53.6      | -115       | 4402                    | 0.0%       | H <sub>U</sub> | South  |
| 21    | M     | 07BC002 | 54.45     | -113.99    | 13014                   | 0.0%       | H <sub>U</sub> | South  |
| 22    | M     | 07BE001 | 54.72     | -113.29    | 74602                   | 0.0%       | H <sub>U</sub> | South  |
| 23    | M     | 07BF002 | 55.45     | -116.49    | 1152                    | 0.0%       | H <sub>U</sub> | South  |
| 24    | M     | 07BJ001 | 55.32     | -115.42    | 1900                    | 0.0%       | H <sub>U</sub> | South  |
| 25    | M     | 07BK007 | 55.26     | -114.23    | 2100                    | 0.0%       | H <sub>U</sub> | East   |
| 26    | M     | 07CD001 | 56.69     | -111.26    | 30792                   | 0.0%       | H <sub>U</sub> | East   |
| 27    | M     | 07EC002 | 55.92     | -124.57    | 5560                    | 0.0%       | H <sub>U</sub> | South  |
| 28    | M     | 07EE007 | 55.08     | -122.9     | 4930                    | 0.0%       | H <sub>U</sub> | South  |
| 29    | M     | 07FB001 | 55.72     | -121.21    | 12100                   | 0.0%       | H <sub>U</sub> | South  |
| 30    | M     | 07FC001 | 56.28     | -120.7     | 15600                   | 0.0%       | H <sub>U</sub> | South  |
| 31    | M     | 07FC003 | 56.68     | -121.22    | 1770                    | 0.0%       | H <sub>U</sub> | South  |
| 32    | M     | 07FD001 | 55.96     | -120.56    | 3630                    | 0.0%       | H <sub>U</sub> | South  |
| 33    | M     | 07FD007 | 55.86     | -120.03    | 2860                    | 14.00%     | H <sub>U</sub> | South  |
| 34    | M     | 07GE001 | 55.07     | -118.8     | 11300                   | 0.0%       | H <sub>U</sub> | South  |

|    |   |         |        |         |         |        |                |        |
|----|---|---------|--------|---------|---------|--------|----------------|--------|
| 35 | M | 07GG001 | 54.75  | -117.21 | 1040    | 0.0%   | H <sub>U</sub> | South  |
| 36 | M | 07GH002 | 55.46  | -117.16 | 11100   | 0.0%   | H <sub>U</sub> | South  |
| 37 | M | 07HA001 | 56.24  | -117.31 | 194374  | 0.0%   | H <sub>R</sub> | South  |
| 38 | M | 07HA003 | 56.06  | -117.13 | 1968    | 0.0%   | H <sub>U</sub> | South  |
| 39 | M | 07HC001 | 56.92  | -117.62 | 4679    | 0.0%   | H <sub>U</sub> | East   |
| 40 | M | 07JD002 | 57.87  | -115.39 | 35800   | 0.0%   | H <sub>U</sub> | East   |
| 41 | M | 07LE002 | 59.15  | -105.54 | 50700   | 4.80%  | H <sub>U</sub> | East   |
| 42 | M | 07MB001 | 58.97  | -108.18 | 9120    | 0.0%   | H <sub>U</sub> | East   |
| 43 | M | 07OC001 | 58.6   | -118.33 | 10370   | 1.30%  | H <sub>U</sub> | East   |
| 44 | M | 10AB001 | 60.47  | -129.12 | 12800   | 0.0%   | H <sub>U</sub> | West   |
| 45 | M | 10AC005 | 59.12  | -129.82 | 882     | 0.0%   | H <sub>U</sub> | West   |
| 46 | M | 10BE004 | 58.85  | -125.38 | 2540    | 0.0%   | H <sub>U</sub> | West   |
| 47 | M | 10BE007 | 59.34  | -125.94 | 1170    | 0.0%   | H <sub>U</sub> | West   |
| 48 | M | 10CB001 | 57.23  | -122.69 | 2180    | 0.0%   | H <sub>U</sub> | South  |
| 49 | M | 10EA003 | 61.53  | -125.41 | 8560    | 0.30%  | H <sub>U</sub> | West   |
| 50 | M | 10EB001 | 61.64  | -125.8  | 14500   | 0.0%   | H <sub>U</sub> | West   |
| 51 | M | 10ED001 | 60.24  | -123.48 | 222000  | 2.50%  | H <sub>U</sub> | West   |
| 52 | M | 10GC001 | 61.87  | -121.36 | 127000  | 0.0%   | H <sub>M</sub> | East   |
| 53 | M | 10LA002 | 66.79  | -133.09 | 18750   | 1.10%  | H <sub>U</sub> | North  |
| 54 | M | 10LC014 | 67.456 | -133.75 | 1679100 | 2.00%  | H <sub>M</sub> | Outlet |
| 55 | M | 10MC002 | 67.26  | -134.89 | 70600   | 6.30%  | H <sub>U</sub> | North  |
| 56 | M | 10ED003 | 61.33  | -122.09 | 542     | 0.0%   | H <sub>U</sub> | West   |
| 57 | O | 11801   | 66.63  | 66.6    | 2950000 | 2.60%  | H <sub>M</sub> | Outlet |
| 58 | O | 11056   | 58.2   | 68.23   | 1500000 | 0.80%  | H <sub>M</sub> | West   |
| 59 | O | 11048   | 55.02  | 73.3    | 769000  | 0.0%   | H <sub>R</sub> | West   |
| 60 | O | 10031   | 61.07  | 68.9    | 2690000 | 5.60%  | H <sub>M</sub> | East   |
| 61 | O | 10021   | 58.3   | 82.88   | 486000  | 0.0%   | H <sub>M</sub> | South  |
| 62 | O | 10062   | 51.28  | 87.72   | 16600   | 9.90%  | H <sub>U</sub> | South  |
| 63 | O | 10126   | 51.02  | 84.32   | 3480    | 5.60%  | H <sub>U</sub> | South  |
| 64 | O | 10176   | 53.73  | 84.95   | 15900   | 5.10%  | H <sub>U</sub> | South  |
| 65 | O | 10219   | 55.32  | 84.1    | 15700   | 5.10%  | H <sub>U</sub> | South  |
| 66 | O | 10277   | 53.33  | 87.23   | 7080    | 5.10%  | H <sub>U</sub> | South  |
| 67 | O | 10317   | 55.38  | 91.62   | 14700   | 12.20% | H <sub>U</sub> | South  |
| 68 | O | 10387   | 56.2   | 87.78   | 9820    | 5.10%  | H <sub>U</sub> | South  |
| 69 | O | 10407   | 56.18  | 86.4    | 3460    | 7.70%  | H <sub>U</sub> | South  |
| 70 | O | 10428   | 57.78  | 82.63   | 25000   | 5.10%  | H <sub>U</sub> | South  |
| 71 | O | 10444   | 56.85  | 83.07   | 2560    | 5.10%  | H <sub>U</sub> | South  |
| 72 | O | 10466   | 59.37  | 82.83   | 6500    | 5.10%  | H <sub>U</sub> | East   |
| 73 | O | 10478   | 59.22  | 78.22   | 31700   | 9.40%  | H <sub>U</sub> | East   |
| 74 | O | 10489   | 59.85  | 81.95   | 24500   | 5.10%  | H <sub>U</sub> | East   |
| 75 | O | 11309   | 55.45  | 78.32   | 12200   | 5.10%  | H <sub>U</sub> | West   |
| 76 | O | 11353   | 56.38  | 75.25   | 16400   | 0.0%   | H <sub>U</sub> | West   |
| 77 | O | 11496   | 57.13  | 69.22   | 2140    | 2.60%  | H <sub>U</sub> | West   |
| 78 | O | 11556   | 66.87  | 65.78   | 1240    | 0.60%  | H <sub>U</sub> | North  |
| 79 | O | 11558   | 66.03  | 68.73   | 15100   | 2.90%  | H <sub>U</sub> | North  |
| 80 | O | 11574   | 64.93  | 77.8    | 31400   | 0.20%  | H <sub>U</sub> | North  |
| 81 | Y | 9803    | 67.43  | 86.48   | 2440000 | 0.0%   | H <sub>M</sub> | Outlet |
| 82 | Y | 9092    | 61.1   | 90.08   | 1760000 | 0.0%   | H <sub>M</sub> | North  |

|     |   |      |       |        |         |        |                |        |
|-----|---|------|-------|--------|---------|--------|----------------|--------|
| 83  | Y | 9002 | 51.72 | 94.4   | 115000  | 0.0%   | H <sub>U</sub> | South  |
| 84  | Y | 8091 | 58.35 | 93.55  | 1040000 | 0.0%   | H <sub>R</sub> | South  |
| 85  | Y | 9079 | 58.45 | 92.15  | 1400000 | 0.0%   | H <sub>R</sub> | West   |
| 86  | Y | 7156 | 51.95 | 106.35 | 565     | 0.0%   | H <sub>U</sub> | East   |
| 87  | Y | 7172 | 51.53 | 104.07 | 959     | 0.0%   | H <sub>U</sub> | South  |
| 88  | Y | 7015 | 55.85 | 110.15 | 20600   | 0.0%   | H <sub>U</sub> | East   |
| 89  | Y | 7024 | 53.6  | 109.6  | 19800   | 0.0%   | H <sub>U</sub> | East   |
| 90  | Y | 7036 | 52.92 | 108.73 | 5050    | 0.0%   | H <sub>U</sub> | East   |
| 91  | Y | 7072 | 50.3  | 108.63 | 15600   | 0.0%   | H <sub>U</sub> | East   |
| 92  | Y | 7102 | 51.2  | 106.97 | 38300   | 0.0%   | H <sub>U</sub> | East   |
| 93  | Y | 9207 | 52.65 | 90.1   | 14400   | 0.0%   | H <sub>U</sub> | West   |
| 94  | Y | 9252 | 53.8  | 92.87  | 31800   | 0.0%   | H <sub>U</sub> | West   |
| 95  | Y | 9372 | 59.12 | 93.48  | 15100   | 0.0%   | H <sub>U</sub> | North  |
| 96  | Y | 9422 | 65.65 | 90.12  | 9100    | 0.0%   | H <sub>U</sub> | North  |
| 97  | Y | 9425 | 65.98 | 84.27  | 10100   | 5.10%  | H <sub>U</sub> | North  |
| 98  | L | 3821 | 70.68 | 127.39 | 2430000 | 0.0%   | H <sub>M</sub> | Outlet |
| 99  | L | 3329 | 63.95 | 124.83 | 452000  | 2.00%  | H <sub>M</sub> | West   |
| 100 | L | 3156 | 60.98 | 115.5  | 32600   | 2.60%  | H <sub>U</sub> | West   |
| 101 | L | 3157 | 60.17 | 116.8  | 27600   | 0.30%  | H <sub>U</sub> | South  |
| 102 | L | 3277 | 60.68 | 135.03 | 24200   | 2.60%  | H <sub>U</sub> | East   |
| 103 | L | 3291 | 59.67 | 127.05 | 23900   | 2.60%  | H <sub>U</sub> | South  |
| 104 | L | 3202 | 60.9  | 120.8  | 16600   | 10.30% | H <sub>U</sub> | West   |
| 105 | L | 3210 | 61.05 | 128.65 | 12200   | 10.30% | H <sub>U</sub> | South  |
| 106 | L | 3219 | 58.97 | 126.27 | 49500   | 10.30% | H <sub>U</sub> | South  |

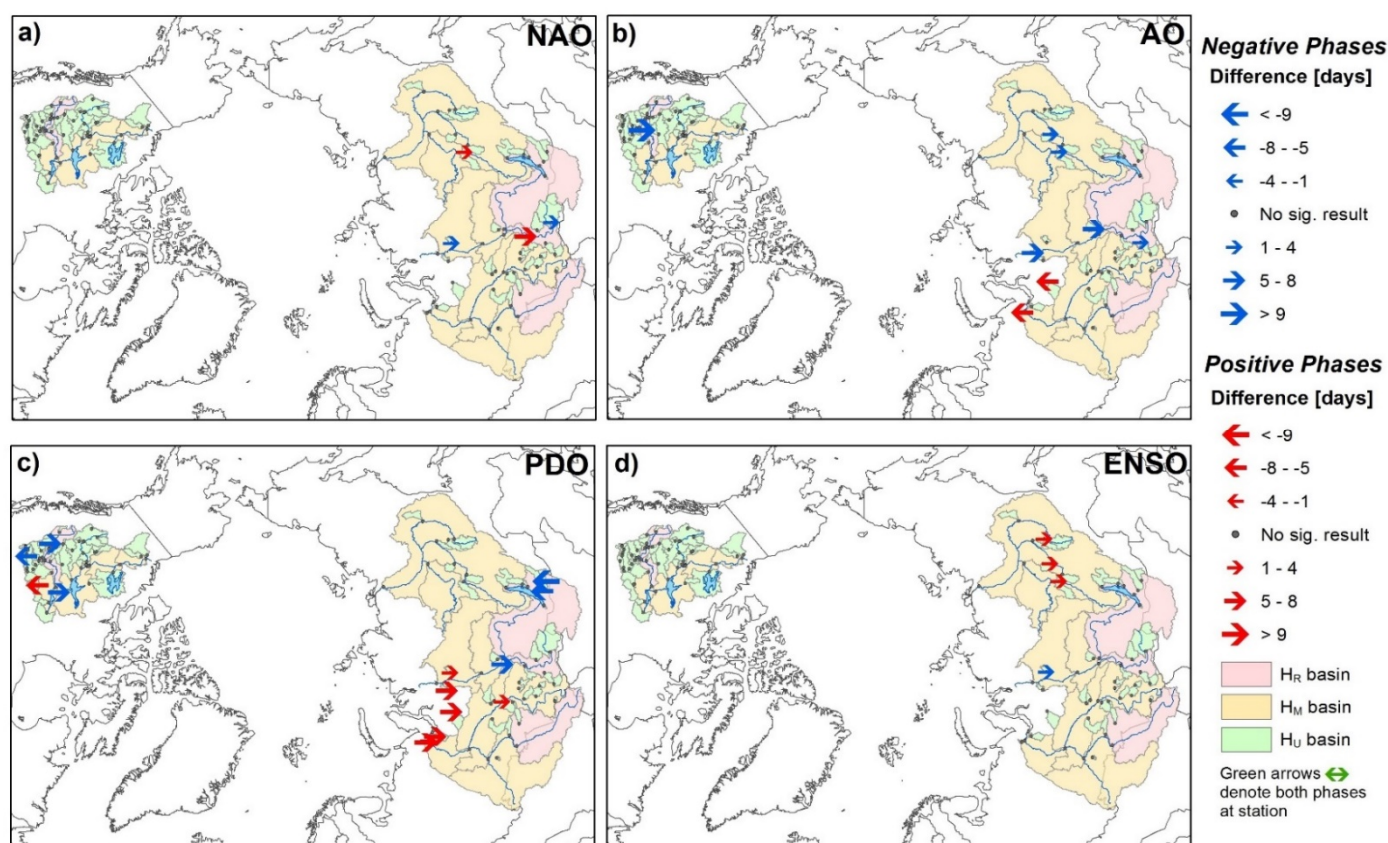

**Figure S1.** Teleconnection relationships between March through May (a) NAO (b) AO (c) PDO and (d) ENSO and freshet pulse dates  $F_P$  during the 1962–2000 period. Blue arrows indicate  $F_P$  is affected by the negative phase of a teleconnection index while red arrows indicates  $F_P$  is affected by the positive phase of the index at a 5% significance level. The direction of the arrows indicate whether  $F_P$  is delayed (pointing right) or advancing (pointing left) while the size of the arrow represents the magnitude.

During t1, NAO and ENSO show little influence in any of the basins during either phase, although some stations exhibited later pulse dates during the negative phase of each oscillation. The negative phase of AO (associated with cooler SAT anomalies) was shown to relate to later pulse dates in some Eurasian and Mackenzie stations while the positive phase was related to earlier pulse dates in two northern Ob basin stations. Positive phase of PDO was correlated with delayed pulse dates in the northern Ob and Yenisei regions. In the Mackenzie basin, negative PDO associated with lower SAT anomalies was correlated with later pulse dates in two stations while positive PDO was correlated with an earlier occurrence of pulse dates in one station.

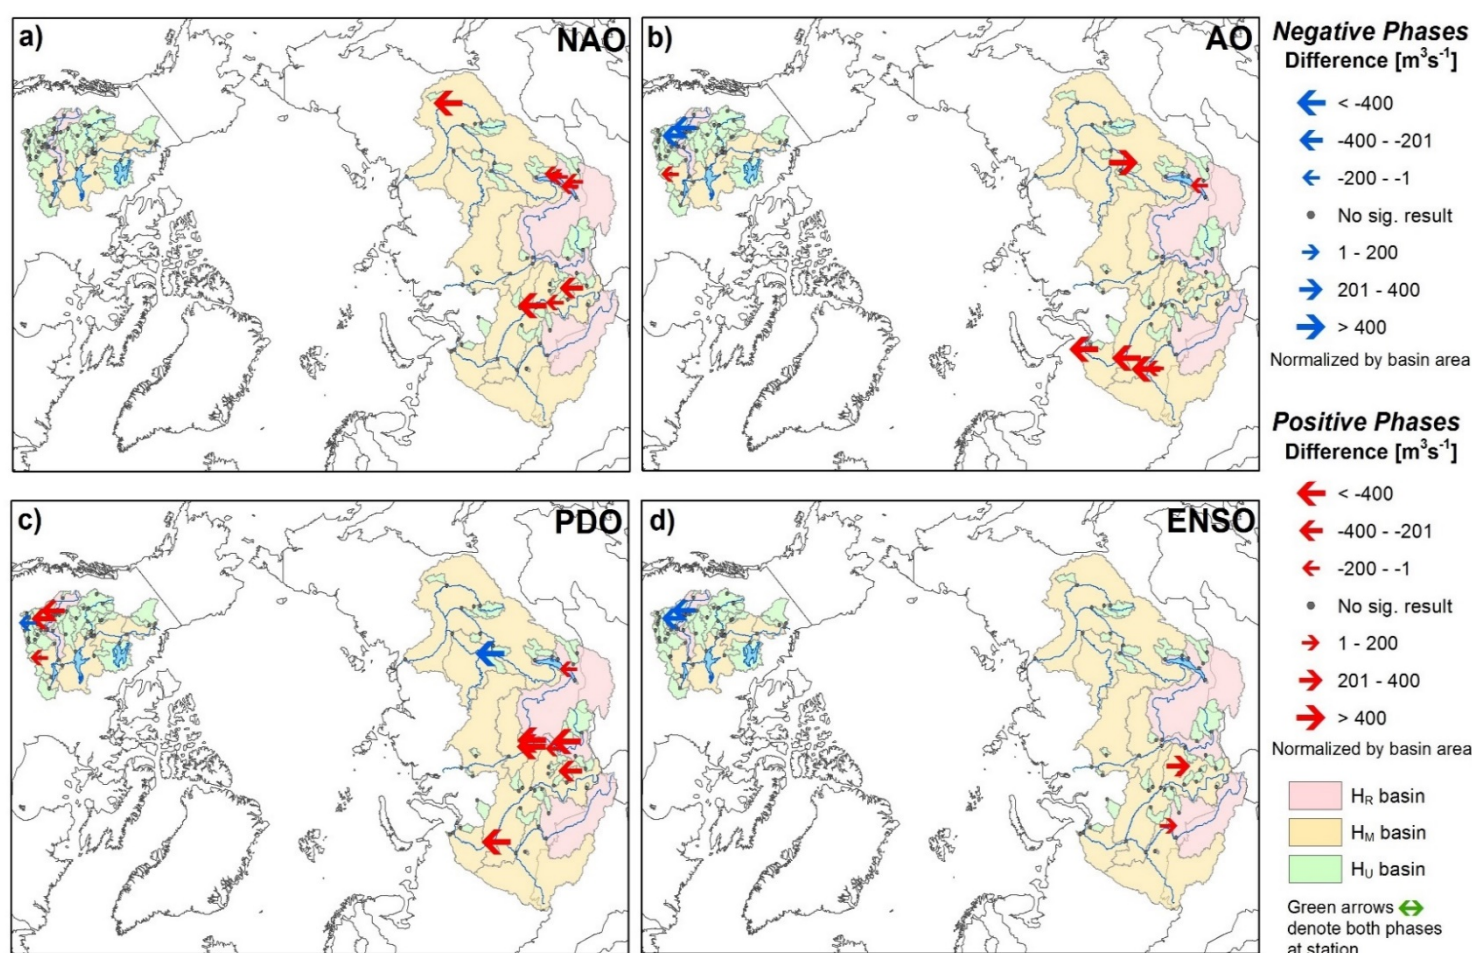

**Figure S2.** Teleconnection relationships between March through May (a) NAO (b) AO (c) PDO and (d) ENSO and peak freshet magnitude  $F_M$  during the 1962–2000 period. Blue arrows indicate  $F_M$  is affected by the negative phase of a teleconnection index while red arrows indicates  $F_M$  is affected by the positive phase of the index at a 5% significance level. The direction of the arrows indicate whether  $F_M$  is increasing (pointing right) or decreasing (pointing left) while the size of the arrow represents the magnitude.

During  $t_1$ , NAO and AO in their positive phases were associated with lower peak freshet magnitudes, particularly in Eurasian basins. NAO exhibited a strong influence in the eastern Ob and Yenisei regions while AO was mostly detectable in northern and western Ob. Similarly, PDO in its positive phase was associated with lower  $F_M$  except most results were located in high-relief regions of the southern Mackenzie and western Yenisei. These findings were consistent with positive SAT anomalies associated with the positive phases of these indices. They were also consistent with positive correlations of temperature with decreased  $F_M$ . Meanwhile, ENSO demonstrated little effect on  $F_M$ .



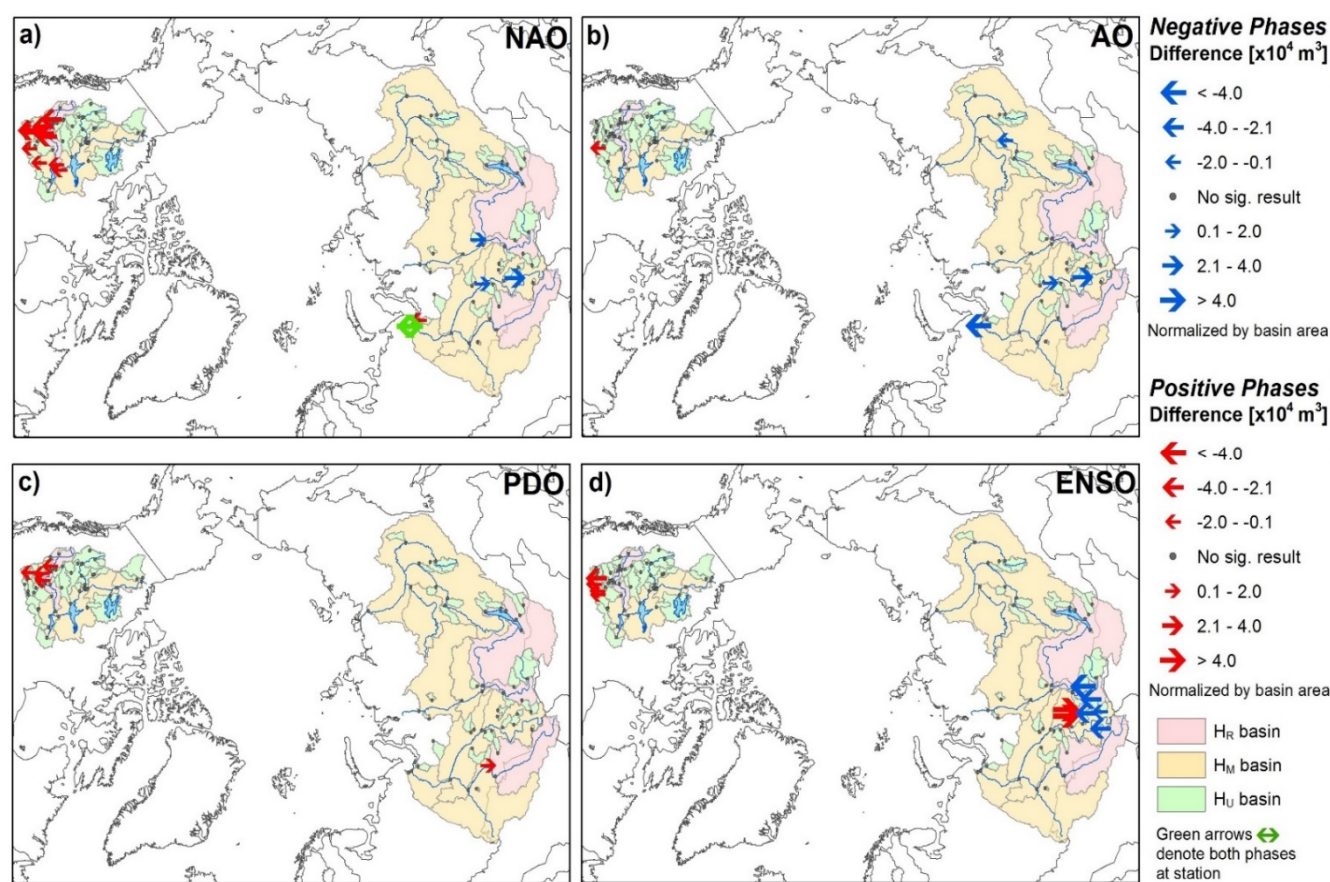

**Figure S3.** Teleconnection relationships between December through February (a) NAO (b) AO (c) PDO and (d) ENSO and freshet volume  $V_2$  during the 1962–2000 period. Blue arrows indicate  $V_2$  is affected by the negative phase of a teleconnection index while red arrows indicates  $V_2$  is affected by the positive phase of the index at a 5% significance level. The direction of the arrows indicate whether  $V_2$  is increasing (pointing right) or decreasing (pointing left) while the size of the arrow represents the magnitude.

Regional patterns were most pronounced during  $t_1$ , with strong influence of positive phases of PDO, AO, NAO and ENSO (El Niño) reflecting positive Central Pacific SST anomalies resulting in warmer, drier winter conditions for the southern Mackenzie basin and correspondingly decreased freshet volumes. In the Eurasian basins, negative NAO and AO were related to increased volumes in some southern Ob basins. This is likely due to regional variation in precipitation anomalies associated with these indices, where negative phases can lead to increased winter precipitation anomalies in southern portions of the Eurasian basins. PDO generally did not exhibit any significant relationships in Eurasian basins. ENSO, meanwhile, showed increased volume during El Niño (wetter winters, regionally) in two Ob sub-basins, while nearby in southern Ob and western Yenisei alpine regions, La Niña (drier winters, regionally) showed significant relationships with decreased freshet volumes.
